# Supplementary material for: Simple and facile synthesis of water-soluble poly(phosphazenium) polymer electrolytes
Source: Royal Society of Chemistry journal article supplement (doi:10.1039/c4ra13101k), 2014-01-01
Supplement: c4ra13101k1.pdf [file c4ra13101k1.pdf]

## **Simple and facile synthesis of water-soluble poly(phosphazanium) polymer electrolytes**

*Christopher G. Arges, Lihui Wang, and Vijay K. Ramani*

Center for Electrochemical Science and Engineering, Department of Chemical and Biological Engineering, 10 W. 33<sup>rd</sup> St, Chicago, IL 60616

*Supplementary Information*

### **EXPERIMENTAL**

*NMR characterization* - All NMR measurements were carried out on a Bruker Avance 360 MHz NMR spectrometer. The NMR experiments performed were as follows: 1D <sup>1</sup>H (spectra collected at 360 MHz), 1D <sup>1</sup>H decoupled phosphorus (spectra collected at 360 MHz), <sup>13</sup>C (spectra collected at 90 MHz – proton decoupled), and <sup>31</sup>P (spectra collected at 146 MHz). 2D NMR experiments included homonuclear (i.e., proton-proton) correlation spectroscopy (COSY), <sup>1</sup>H-<sup>13</sup>C heteronuclear multiple-quantum correlation spectroscopy (HMQC), and <sup>1</sup>H-<sup>31</sup>P HMQC. See Table S1 below that summarizes the 2D NMR experimental techniques. Sample preparation for NMR spectra acquisition was as follows: 20 to 30 mg of sample was dissolved in 600 μL of deuterated solvent – deuterium oxide (D<sub>2</sub>O) for PMCHAP<sup>+</sup> and deuterated chloroform (CDCl<sub>3</sub>) for PMCHAP and CDCl<sub>3</sub> for PDCP. An internal standard, tetramethylsilane, or the signal from the solvent was used for calibration of the chemical shift in the NMR spectra.

**Table S1.** Details and parameters for 2D NMR experiments

| Technique                           | Details                                                                                                                                                                                                                       |
|-------------------------------------|-------------------------------------------------------------------------------------------------------------------------------------------------------------------------------------------------------------------------------|
| COSY                                | 2D homonuclear shift correlation using gradient pulses for selection<br>Incremental resolution: 1024 x 128<br>Number of scans: 4                                                                                              |
| $^1\text{H}$ - $^{13}\text{C}$ HMQC | 2D HMQC $^1\text{H}$ -1/X correlation via heteronuclear zero and double quantum coherence with decoupling during acquisition using gradient pulses for selection<br>Incremental resolution: 1024 x 128<br>Number of scans: 10 |
| $^1\text{H}$ - $^{31}\text{P}$ HMQC | 2D HMQC $^1\text{H}$ -1/X correlation via heteronuclear zero and double quantum coherence with decoupling during acquisition using gradient pulses for selection<br>Incremental resolution: 1024 x 128<br>Number of scans: 4  |

## RESULTS

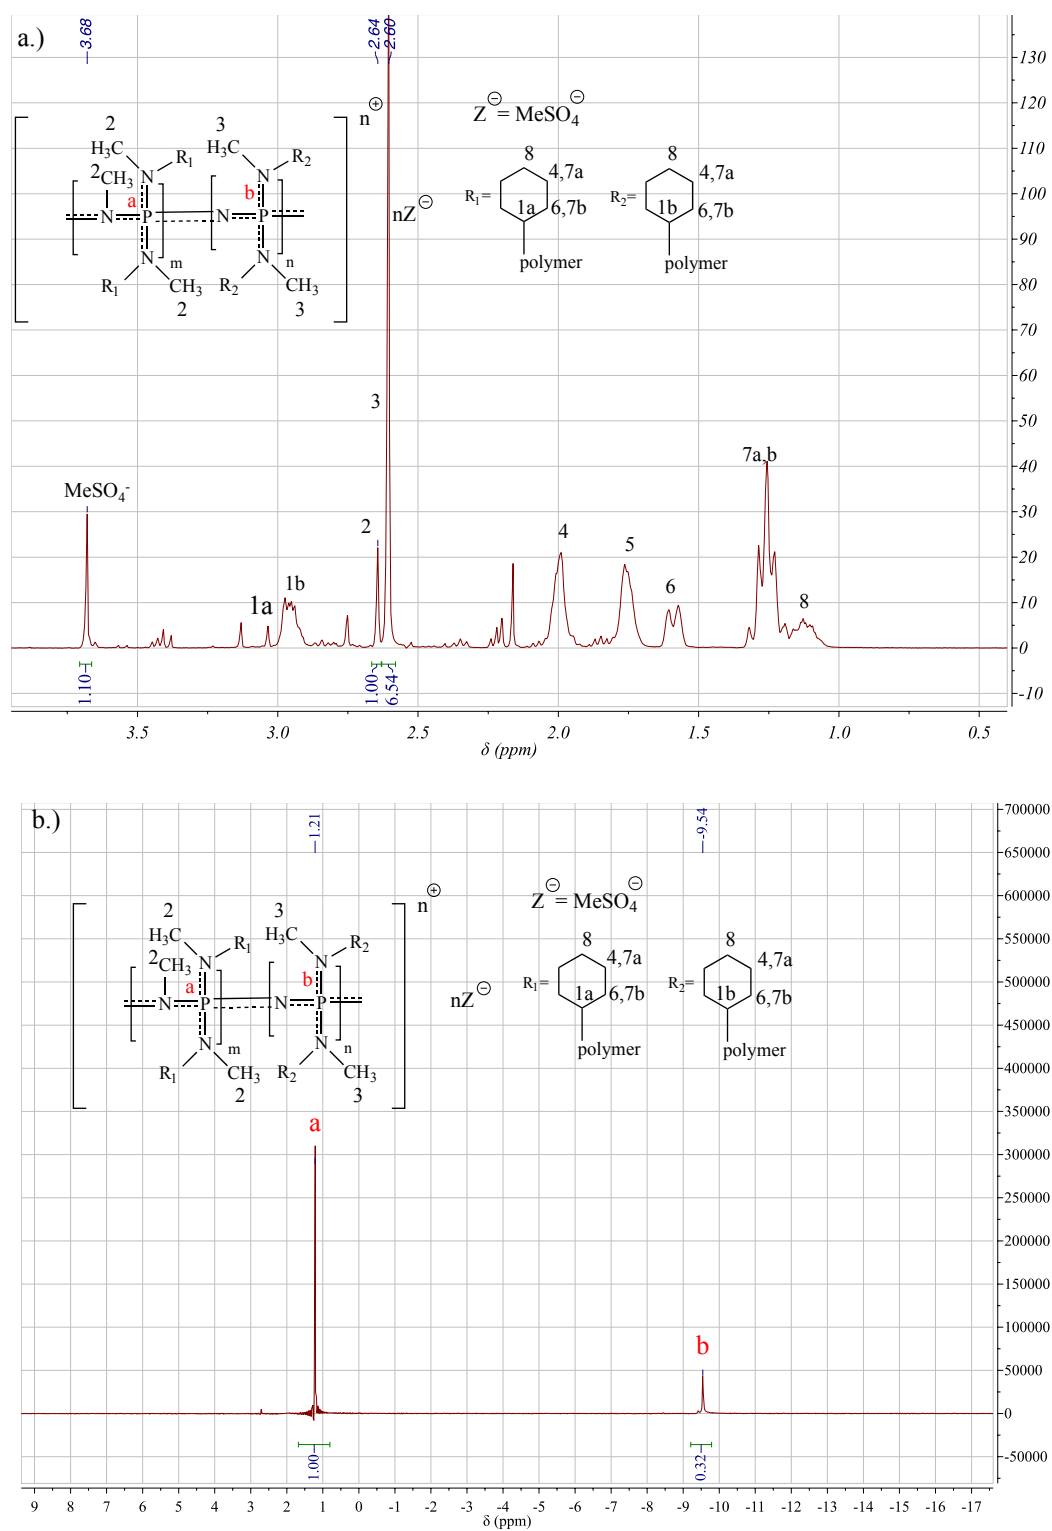

**Fig. S1.** a.) Integrated  $^1\text{H}$  NMR spectra of PMCHAP $^+$  batch #2. b.) Integrated  $^{31}\text{P}$  NMR spectra of PMCHAP $^+$  batch #1. Both spectra used  $\text{D}_2\text{O}$  as the NMR solvent.

*Degree of methylation (i.e., average number of methylated repeat units) determined by integrating the  $^1\text{H}$  NMR and the  $^{31}\text{P}$  NMR*

By  $^1\text{H}$  NMR:

$$DF = \frac{\text{Area}(\delta = 2.64 \text{ ppm})}{\text{Ratio of protons} \cdot \text{Area}(\delta = 2.60 \text{ ppm})}$$

Note: Ratio of protons is equal to 1.5 because the signal at 2.65 ppm corresponds to 9 protons, while the signal at 2.60 ppm corresponds to 6 protons.

By  $^{31}\text{P}$  NMR:

$$DF = \frac{\text{Area}(\delta = -9 \text{ ppm})}{\text{Area}(\delta = -9 \text{ ppm}) + \text{Area}(\delta = 1 \text{ ppm})}$$

**Table S2.** Degree of methylation of PMCHAP<sup>+</sup> obtained by integrating  $^1\text{H}$  and  $^{31}\text{P}$  NMR spectra

| Batch | DF from $^1\text{H}$ NMR | Std. error | DF from $^{31}\text{P}$ NMR | Std. error |
|-------|--------------------------|------------|-----------------------------|------------|
| 1     | 0.104                    | 0.005      | 0.214                       | 0.034      |
| 2     | 0.099                    | n/a        | 0.115                       | n/a        |

Std. error calculated from n=3 samples. Better agreement between the integrated  $^1\text{H}$  and  $^{31}\text{P}$  NMR spectra was observed for batch #2.

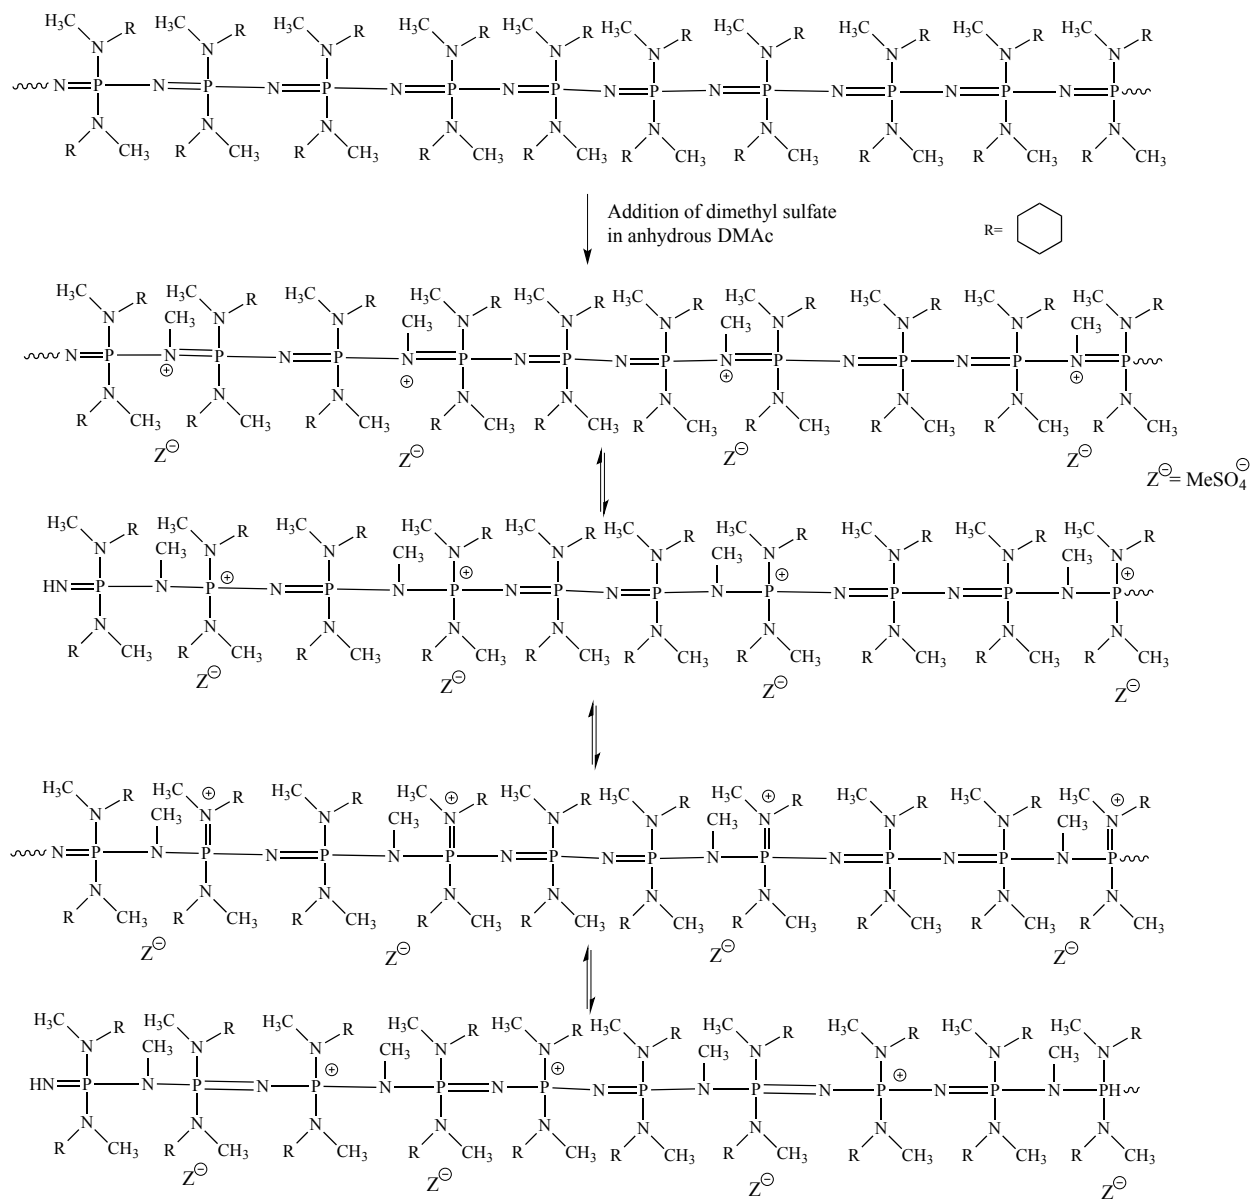

**Fig. S2.** The synthesis of PMCHAP<sup>+</sup> using dimethyl sulfate (DMS). A polymer chain with 4 of the 10 repeat units has been methylated. Alternative resonance structures are illustrated.

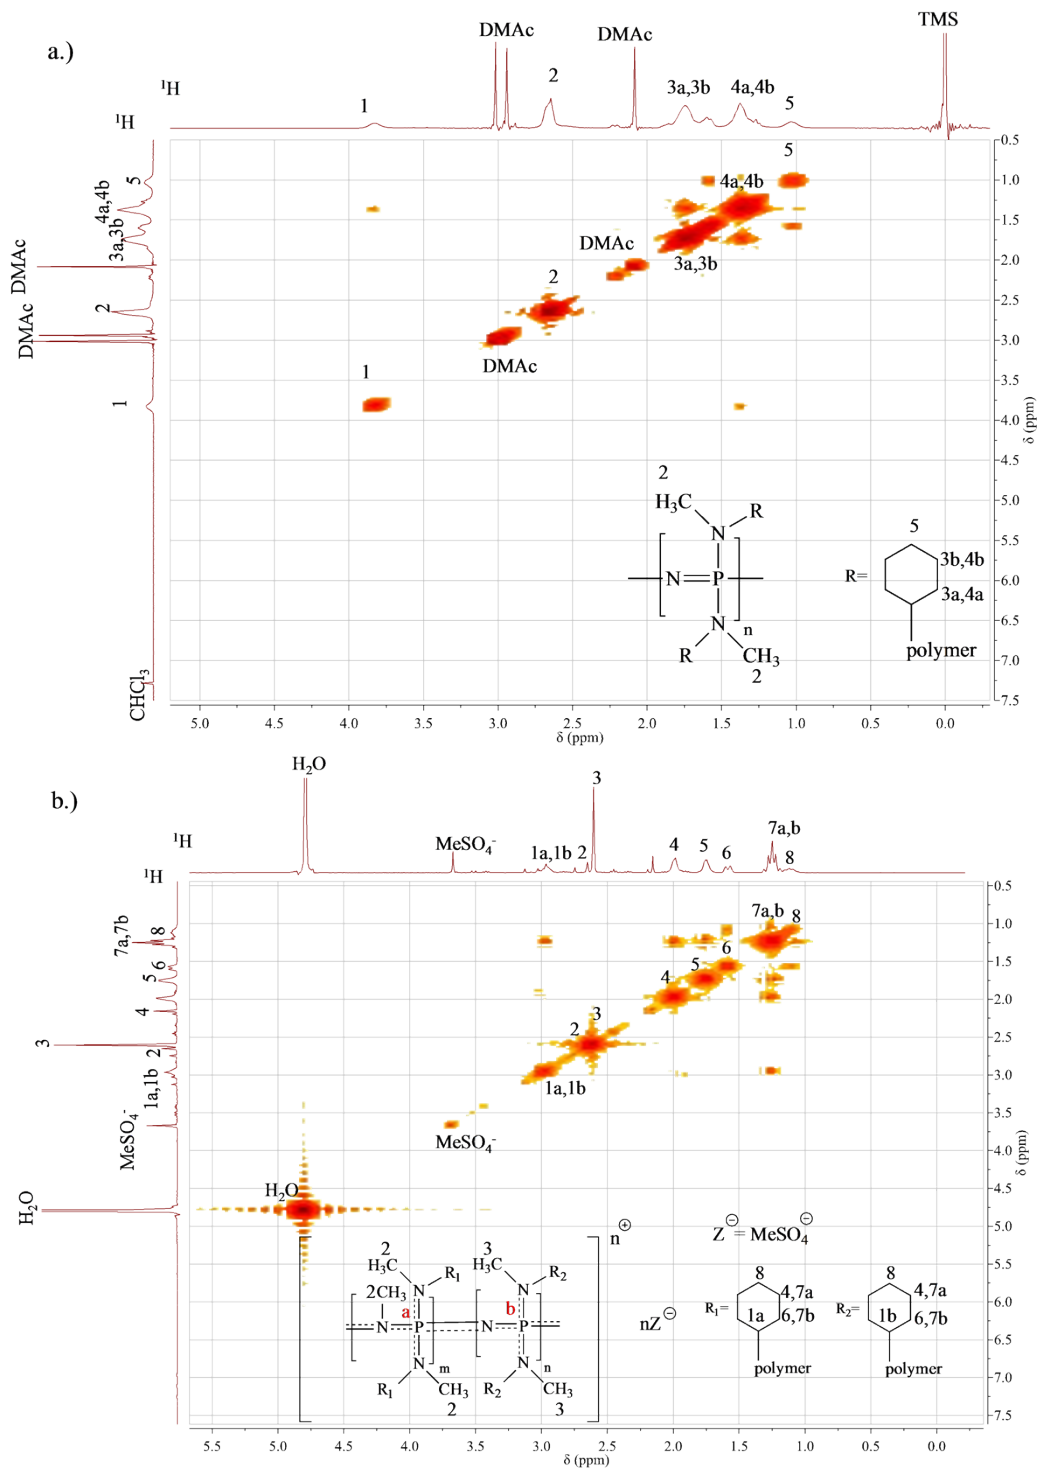

**Fig. S3.** COSY spectra of a.) PMCHAP and b.) PMCHAP $^+$ . a.) used  $\text{CDCl}_3$  as the NMR solvent while b.) used  $\text{D}_2\text{O}$  as the NMR solvent.

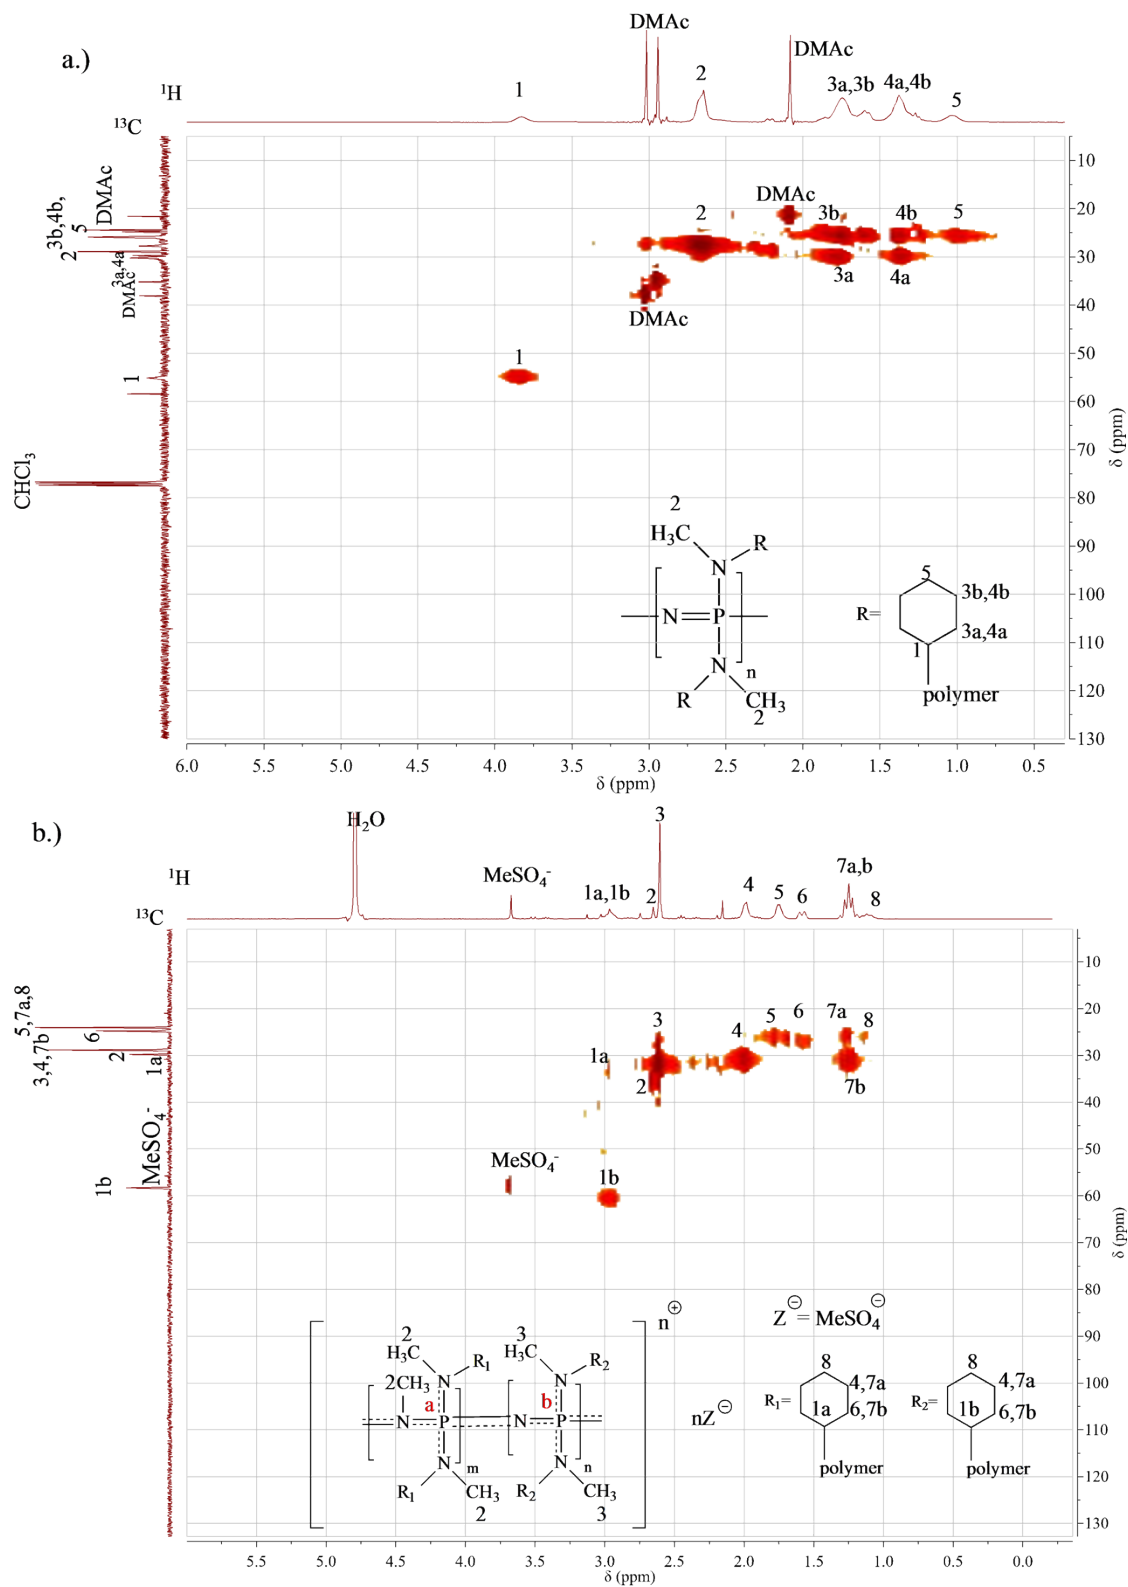

**Fig. S4.**  $^1\text{H}$ - $^{13}\text{C}$  HMQC spectra of a.) PMCHAP and b.) PMCHAP $^+$ . a.) used  $\text{CDCl}_3$  as the NMR solvent while b.) used  $\text{D}_2\text{O}$  as the NMR solvent.

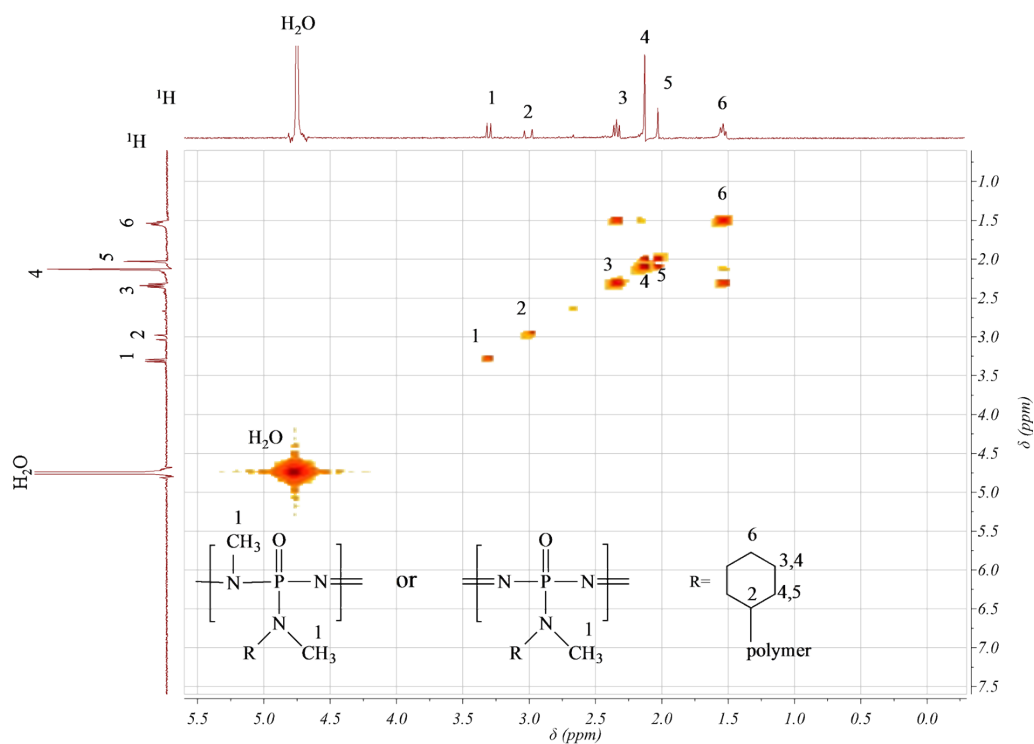

**Fig. S5.** COSY spectrum of  $\text{PMCHAP}^+$  after exposure to 1 M NaOD in  $\text{D}_2\text{O}$  for 3 days at 60 °C. NMR solvent for this sample was  $\text{D}_2\text{O}$ .
